# Supplementary material for: Effects of silylene ligands on the catalytic activity of [PSiP] pincer cobalt(ii) chloride for N2 silylation
Source: Royal Society of Chemistry journal article supplement (doi:10.1039/d4nj00883a), 2024-01-01
Supplement: d4nj00883a1.pdf [file d4nj00883a1.pdf]

## Supporting Information

### Effects of silylene ligands on catalytic activity of [PSiP] pincer cobalt(II) chloride for N<sub>2</sub> silylation

Min Zhang, Yanhong Dong, Qingshuang Li, Xiaoyan Li, Hongjian Sun\*

*School of Chemistry and Chemical Engineering, Key Laboratory of Special Functional Aggregated Materials, Ministry of Education, Shandong University, Shanda Nanlu 27, 250100 Jinan, People's Republic of China*

#### Correspondence

E-mail address: [hjsun@sdu.edu.cn](mailto:hjsun@sdu.edu.cn)

#### Contents

|                                                                 |    |
|-----------------------------------------------------------------|----|
| <b>1. Table S1.</b> Crystallographic Data for Complex <b>3</b>  | S2 |
| <b>2.</b> IR and <sup>1</sup> H NMR spectra of Complex <b>3</b> | S3 |
| <b>3.</b> Mechanistic Study                                     | S4 |

### 1. Table S1 Crystallographic Data for complex 3

|                                             |                                                                                                 |
|---------------------------------------------|-------------------------------------------------------------------------------------------------|
| Empirical formula                           | C <sub>52</sub> H <sub>54</sub> Cl <sub>2</sub> CoN <sub>2</sub> P <sub>2</sub> Si <sub>2</sub> |
| Formula weight                              | 954.92                                                                                          |
| Temperature/K                               | 173.00(10)                                                                                      |
| Crystal system                              | monoclinic                                                                                      |
| Space group                                 | Cc                                                                                              |
| a/Å                                         | 15.8498(2)                                                                                      |
| b/Å                                         | 16.2943(2)                                                                                      |
| c/Å                                         | 18.5455(2)                                                                                      |
| α/°                                         | 90                                                                                              |
| β/°                                         | 98.3770(10)                                                                                     |
| γ/°                                         | 90                                                                                              |
| Volume/Å <sup>3</sup>                       | 4738.49(10)                                                                                     |
| Z                                           | 4                                                                                               |
| ρ <sub>calc</sub> /cm <sup>3</sup>          | 1.339                                                                                           |
| μ/mm <sup>-1</sup>                          | 5.287                                                                                           |
| F(000)                                      | 1996.0                                                                                          |
| Crystal size/mm <sup>3</sup>                | 0.1 × 0.07 × 0.05                                                                               |
| Radiation                                   | Cu Kα (λ = 1.54184)                                                                             |
| 2θ range for data collection/°              | 7.824 to 153.452                                                                                |
| Index ranges                                | -19 ≤ h ≤ 19, -20 ≤ k ≤ 20, -23 ≤ l ≤ 22                                                        |
| Reflections collected                       | 30338                                                                                           |
| Independent reflections                     | 8452 [R <sub>int</sub> = 0.0403, R <sub>sigma</sub> = 0.0380]                                   |
| Data/restraints/parameters                  | 8452/2/557                                                                                      |
| Goodness-of-fit on F <sup>2</sup>           | 1.023                                                                                           |
| Final R indexes [I ≥ 2σ (I)]                | R <sub>1</sub> = 0.0273, wR <sub>2</sub> = 0.0635                                               |
| Final R indexes [all data]                  | R <sub>1</sub> = 0.0294, wR <sub>2</sub> = 0.0642                                               |
| Largest diff. peak/hole / e Å <sup>-3</sup> | 0.23/-0.33                                                                                      |
| Flack parameter                             | -0.027(2)                                                                                       |

## 2. IR and $^1\text{H}$ NMR spectrum of Complex 3

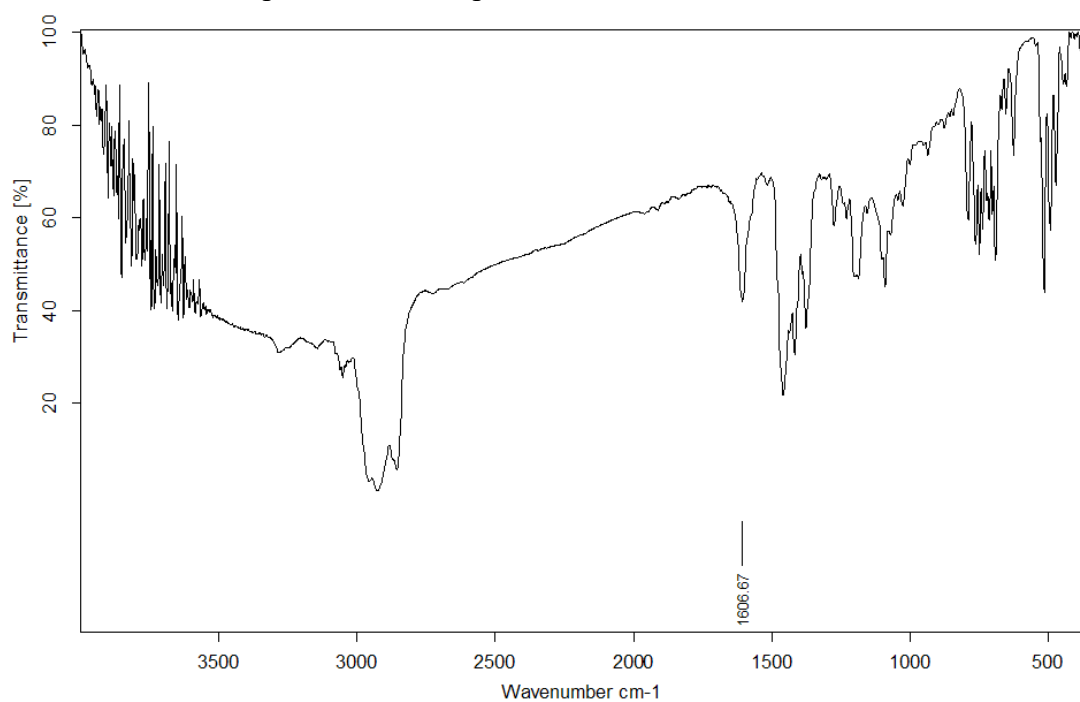

**Figure S1.** The IR spectrum of cobalt complex 3

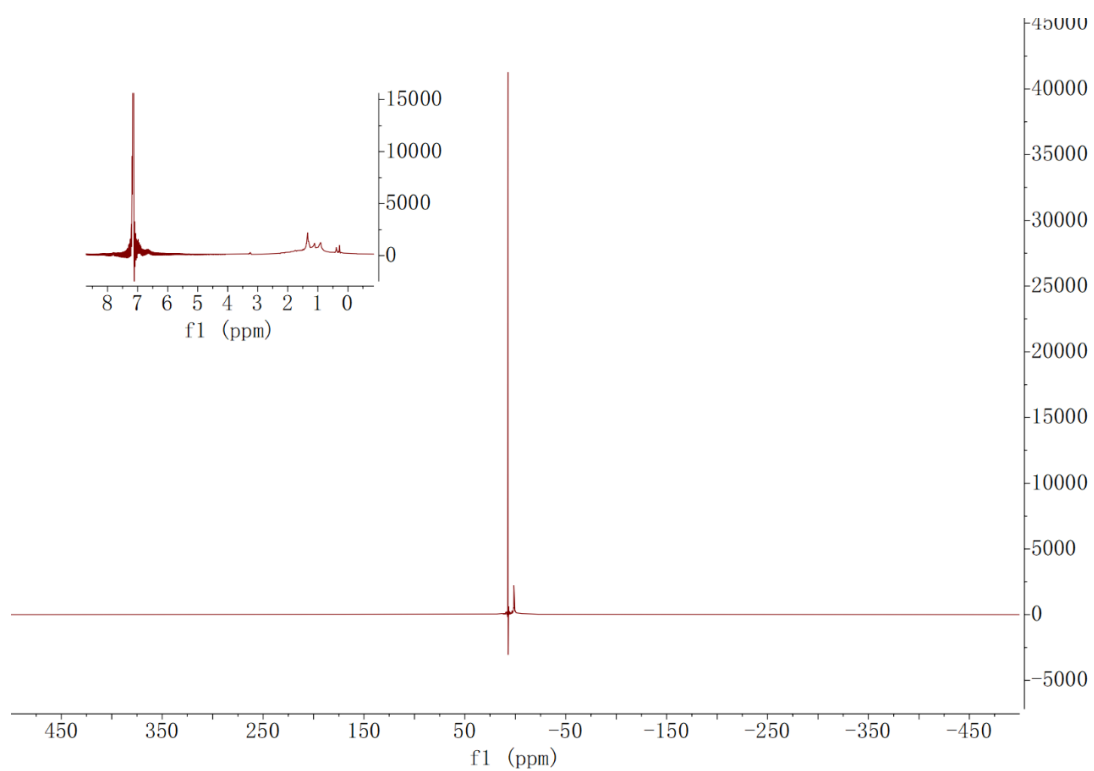

**Figure S2.** The  $^1\text{H}$  NMR spectrum of complex 3

### 3. Mechanistic Study

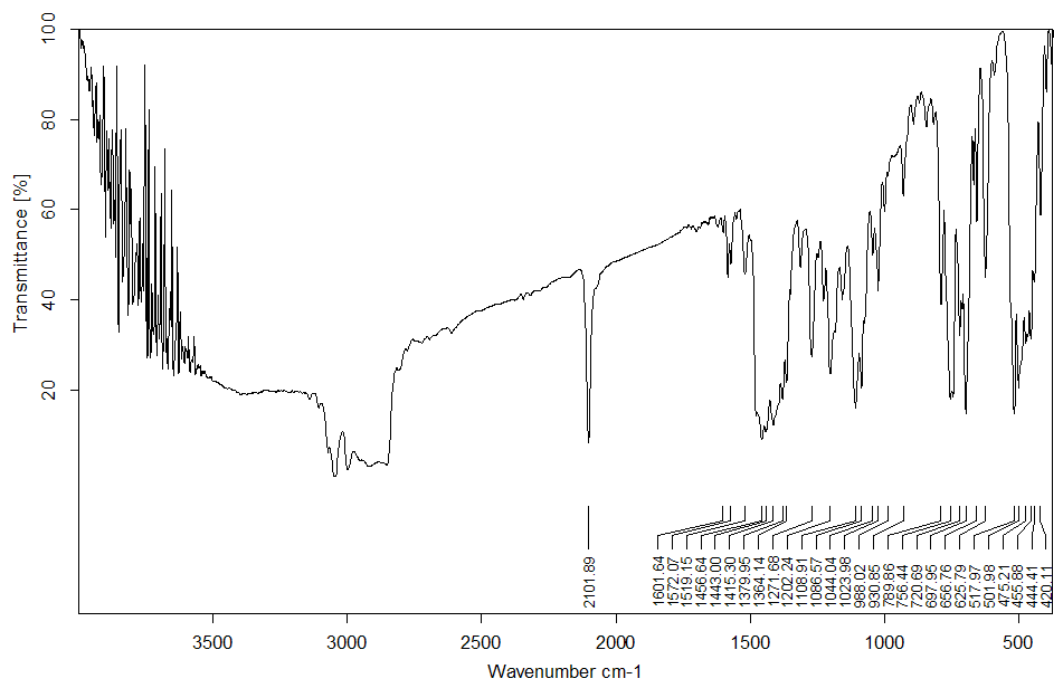

**Figure S3.** *In situ* IR Spectrum of Stoichiometric Reaction of **3** with  $KC_8$  after 6 h.
